# Supplementary material
Source: publisher figshare collection journal article supplement (https://acs.figshare.com/ndownloader/files/16770263)
Supplement: Supplementary file 1 [file 16770263]

# Supporting Information

## Graphene Membranes for Hall Sensors and Microphones Integrated with CMOS-Compatible Processes

Sebastian Wittmann<sup>1,2\*</sup>, Christoph Glacer<sup>3</sup>, Stefan Wagner<sup>4</sup>, Stephan Pindl<sup>1</sup>, Max C. Lemme<sup>2,4\*</sup>

<sup>1</sup>Infineon Technologies AG, Wernerwerkstrasse 2, 93049 Regensburg, Germany

<sup>2</sup>RWTH Aachen University, Chair of Electronic Devices, Otto-Blumenthal-Straße 2, 52074 Aachen, Germany

<sup>3</sup>Infineon Technologies AG, Am Campeon 1-15, 85579 Neubiberg, Germany

<sup>4</sup>AMO GmbH, Otto-Blumenthal-Straße 25, 52074 Aachen, Germany

\*Authors to whom correspondence should be addressed:

Max C. Lemme - [max.lemme@eld.rwth-aachen.de](mailto:max.lemme@eld.rwth-aachen.de)

### Calculation model for microphone sensitivity from graphene Raman modes

The dependence of the position of the G mode with doping  $n$ <sup>1-3</sup> is given in equation 1:

$$\omega_G = \omega_{G0} + \frac{\alpha}{2\pi c \hbar} \cdot 10^{-5} \int_{-\infty}^{\infty} \text{sign}(E) \frac{(f_{FD}(E - E_F) - f_{FD}(E)) \cdot E^2}{E^2 - (\omega_{G0} \hbar / 2)^2} dE \quad (1)$$

with  $\alpha = 4.39 \cdot 10^{-3}$  as a fitting parameter,  $f_{FD}(E) = 1 / (\exp(E / k_B T) + 1)$  as the Fermi-Dirac distribution with  $E_F = \text{sign}(n) \cdot \sqrt{|n| (10^{12} \text{cm}^{-2})} / (10.36 \cdot 10^{-8})$  and  $\omega_{G0} \approx 1581 \text{cm}^{-1}$  as the position of the G mode nearly without doping and stress<sup>4</sup>. There exists no analytical solution for equation 1 at finite temperatures. The dependence of the G mode with electron/hole density  $n$  was thus determined by approximation with a square root function at 300 K, which results in equation 2:

$$\omega_G(n) = \omega_{G0} + \sqrt{p_1 \cdot |n|} + p_2 + p_3 \quad (2)$$

with the fitting parameters  $p_1 = 12.13$ ,  $p_2 = 1.088$  and  $p_3 = -1.313$  and an electron/hole density of  $n = 10^{12} \text{cm}^{-2}$ . The dispersion of the G mode with mechanical strain is in principle different for the two sub-modes  $G^+$  and  $G^-$ , but for small elongations  $\varepsilon$ , the displacement of both sub-modes is equal and shifts with  $-10.8 \text{cm}^{-1}/\%$ <sup>5</sup>. Therefore the total dependence of

the G mode with doping concentration and mechanical strain can be described with equation 3 in the present case.

$$\omega_G(n, \varepsilon) = \omega_{G0} + \sqrt{p_1 \cdot |n| + p_2 + p_3} - 10.8 \frac{\text{cm}^{-1}}{\%} \varepsilon \quad (3)$$

The dependence of the position of the 2D mode with excitation wavelength  $\lambda$ <sup>6</sup>, doping  $n$ <sup>7</sup> and stress  $\varepsilon$ <sup>5</sup> can be described by equation 4.

$$\omega_{2D}(n, \varepsilon, \lambda) = \omega_{2D0} + (514.5 - \lambda) \cdot 70.94 \cdot 10^{-3} \frac{\text{cm}^{-1}}{\text{nm}} + \frac{25 \text{ cm}^{-1}}{\text{eV}} \cdot |E_F| - \frac{21 \text{ cm}^{-1}}{\%} \varepsilon \quad (4)$$

Where  $25 \text{ cm}^{-1}/\text{eV}$  is the dependence on charge carrier density (Fermi energy level) and  $-21 \text{ cm}^{-1}/\%$  is the dependence with mechanical stress. From the dependencies of the G and the 2D mode on charge carrier density and mechanical stress, the elongation of the graphene plane due to mechanical stress can be calculated with equation 5:

$$\varepsilon(\Delta\omega_G, \Delta\omega_{2D}) = -\frac{q_1}{2 \cdot q_2} + \sqrt{\frac{q_1^2}{4 \cdot q_2^2} - q_3} \% \quad (5)$$

The following substitutions are required:

$$\Delta\omega_G(n, \varepsilon) = \omega_G(n, \varepsilon) - \omega_{G0} \quad (6)$$

$$\Delta\omega_{2D}(n, \varepsilon, \lambda) = \omega_{2D}(n, \varepsilon, \lambda) - \omega_{2D0} - (514.5 - \lambda) \cdot 70.94 \cdot 10^{-3} \text{ cm}^{-1}/\text{nm} \quad (7)$$

$$q_1 = 42 \cdot \Delta\omega_{2D}(n, \varepsilon, \lambda) - 5.467532873 \cdot (\Delta\omega_G(n, \varepsilon) + 1.313) \quad (8)$$

$$q_2 = \Delta\omega_G(n, \varepsilon) - 1.420766436 \quad (9)$$

$$q_3 = (\Delta\omega_{2D}^2(n, \varepsilon, \lambda) + 0.08969) / (\Delta\omega_G(n, \varepsilon) - 1.420766436) \quad (10)$$

From the relation  $\sigma = E \cdot \varepsilon$ , with  $E$  as the E-modulus in graphene ( $1020 \text{ GPa}$ <sup>8</sup>), the surface tension in the graphene plane can be calculated from the Raman spectra. The mechanical compliancy for circular membranes is defined in equation 11:<sup>9</sup>

$$C_m^* = \left( \frac{1}{1 + 1.1 \cdot (\sigma_c / \sigma)^{0.6}} \right) \cdot \left( \frac{1}{\sigma_c / \sigma + 1} \right) \cdot \frac{R^2}{8 \cdot t \cdot \sigma} \quad (11)$$

with  $\sigma_c$  as the characteristic surface tension<sup>9</sup>

$$\sigma_c = \frac{2 \cdot E \cdot t^2}{(1 - \nu^2) \cdot R^2} \quad (12)$$

and  $R$  as the membrane radius,  $t$  as the thickness of the membrane ( $3.35 \cdot 10^{-10}$  m)<sup>10</sup> and  $\nu = 0.16$  as the Poisson ratio of graphene<sup>11</sup>. From these equations the sensitivity of the graphene-based microphone can be calculated<sup>9</sup>:

$$S_{\alpha} = \frac{U_0}{U_p} \cdot \sqrt{\frac{8 \cdot x_0 \cdot C_m^*}{27 \cdot \epsilon_0}} \quad (13)$$

with  $U_0$  as the bias voltage of the microphone,  $U_p$  as the collapse voltage,  $x_0$  as the distance between the graphene membrane and the perforated counter electrode ( $x_0 = 2.2 \mu\text{m}$ ) and  $\epsilon_0$  as the permittivity of air.

## References

- (1) Lazzeri, M.; Mauri, F. Nonadiabatic Kohn Anomaly in a Doped Graphene Monolayer. *Phys. Rev. Lett.* **2006**, *97*, 266407-266410.
- (2) Pisana, S.; Lazzeri, M.; Casiraghi, C.; Novoselov, K. S.; Geim, A. K.; Ferrari, A. C.; Mauri, F. Breakdown of the Adiabatic Born–Oppenheimer Approximation in Graphene. *Nat. Mater.* **2007**, *6*, 198–201.
- (3) Ni, Z. H.; Yu, T.; Lu, Y. H.; Wang, Y. Y.; Feng, Y. P.; Shen, Z. X. Uniaxial Strain on Graphene: Raman Spectroscopy Study and Band-Gap Opening. *ACS Nano* **2008**, *2*, 2301–2305.
- (4) Lee, J. E.; Ahn, G.; Shim, J.; Lee, Y. S.; Ryu, S. Optical Separation of Mechanical Strain from Charge Doping in Graphene. *Nat. Commun.* **2012**, *3*, 1024-1031.
- (5) Huang, M.; Yan, H.; Chen, C.; Song, D.; Heinz, T. F.; Hone, J. Phonon Softening and Crystallographic Orientation of Strained Graphene Studied by Raman Spectroscopy. *Proc. Natl. Acad. Sci.* **2009**, *106*, 7304–7308.
- (6) Malard, L. M.; Pimenta, M. A.; Dresselhaus, G.; Dresselhaus, M. S. Raman Spectroscopy in Graphene. *Phys. Rep.* **2009**, *473*, 51–87.
- (7) Li, Y. *Probing the Response of Two-Dimensional Crystals by Optical Spectroscopy*; Springer Theses; Springer International Publishing, 2016.
- (8) Lee, C.; Wei, X.; Kysar, J. W.; Hone, J. Measurement of the Elastic Properties and Intrinsic Strength of Monolayer Graphene. *Science* **2008**, *321*, 385–388.
- (9) Földner, M. *Modellierung und Herstellung Kapazitiver Mikrofone in BiCMOS-Technologie*; 2004.
- (10) Marsh, H.; Rodríguez-Reinoso, F. *Sciences of Carbon Materials*; Universidad de Alicante, 2000.
- (11) Kelly, B. T. *Physics of Graphite*; Applied Science: London, 1981.
